# Supplementary material
Source: Elsevier journal article supplement (https://www.sciencedirect.com/science/article/pii/S0211563819300963)
Supplement: mmc1 [file S0211563819300963:mmc1.docx]

**Tabla 1 online. ESTRATEGIAS DE BÚSQUEDA**

| **Base de datos** | **Estrategia de búsqueda** | **Resultados** |
| --- | --- | --- |
| **Pubmed (advanced)** | (("Infant, Premature"[Mesh] AND "Massage"[Mesh] AND "Body Weight"[Mesh] AND "Growth and Development"[Mesh])) OR (("premature neonates"[tiab] OR "preterm infants"[tiab] OR neonates[tiab] OR "premature infant"[tiab] OR "low birth-weight infant"[tiab]) AND (massage[tiab] OR "massage therapy"[tiab] OR "oil massage"[tiab]) AND (weight[tiab] OR "weight gain"[tiab] OR "growth quality"[tiab] OR growth[tiab] OR "motor function"[tiab] OR "neonatal development"[tiab] OR "growth and development"[tiab])) | **67** |
| **PEDRO (advanced)** | Abstract and title: preterm  Therapy: stretching, mobilisation, manipulation, massage  Method: clinical trial  When searching: match all search terms (AND) | **47** |
| **BVS** | mh:("Infant, Premature" AND "Massage" AND "Body Weight" AND "Growth and Development") OR ti:(("premature neonates" OR "preterm infants" OR neonates OR "premature infant" OR "low birth-weight infant") AND (massage OR "massage therapy" OR "oil massage") AND (weight OR "weight gain" OR "growth quality" OR growth OR "motor function" OR "neonatal development" OR "growth and development")) OR ab:(("premature neonates" OR "preterm infants" OR neonates OR "premature infant" OR "low birth-weight infant") AND (massage OR "massage therapy" OR "oil massage") AND (weight OR "weight gain" OR "growth quality" OR growth OR "motor function" OR "neonatal development" OR "growth and development")) | **60** |
| **Science**  **Direct**  **(Journal-busqueda experta)** | tak(("premature neonates" OR "preterm infants" OR neonates OR "premature infant" OR "low birth-weight infant") AND (massage OR "massage therapy" OR "oil massage") AND (weight OR "weight gain" OR "growth quality" OR growth OR "motor function" OR "neonatal development" OR "growth and development")) | **27** |

| **Base de datos** | **Estrategia de búsqueda** | **Resultados** |
| --- | --- | --- |
| **Cochrane Library** | ID Search Hits  #1 "premature neonates" or "preterm infants" or neonates or "premature infant" or "low birth-weight infant":ti,ab,kw (Word variations have been searched) 12016  #2 massage or "massage therapy" or "oil massage":ti,ab,kw (Word variations have been searched) 2996  #3 weight or "weight gain" or "growth quality" or growth or "motor function" or "neonatal development" or "growth and development":ti,ab,kw (Word variations have been searched) 104125  #4 MeSH descriptor: [Infant, Premature] explode all trees 3498  #5 MeSH descriptor: [Massage] explode all trees 1017  #6 MeSH descriptor: [Body Weight] explode all trees 21843  #7 MeSH descriptor: [Growth and Development] explode all trees 23623  #8 (#1 and #2 and #3) or (#4 and #5 and #6 and #7) 94 | **94** |
| **EBSCO** | TI(("premature neonates" OR "preterm infants" OR neonates OR "premature infant" OR "low birth-weight infant") AND (massage OR "massage therapy" OR "oil massage") AND (weight OR "weight gain" OR "growth quality" OR growth OR "motor function" OR "neonatal development" OR "growth and development")) OR AB(("premature neonates" OR "preterm infants" OR neonates OR "premature infant" OR "low birth-weight infant") AND (massage OR "massage therapy" OR "oil massage") AND (weight OR "weight gain" OR "growth quality" OR growth OR "motor function" OR "neonatal development" OR "growth and development")) OR MH("Infant, Premature" AND "Massage" AND "Body Weight" AND "Growth and Development") | **215** |
| **WOS (Web Of Science)** | TS=(("premature neonates" OR "preterm infants" OR neonates OR "premature infant" OR "low birth-weight infant") AND (massage OR "massage therapy" OR "oil massage") AND (weight OR "weight gain" OR "growth quality" OR growth OR "motor function" OR "neonatal development" OR "growth and development"))  TS=(("premature neonates" OR "preterm infants" OR neonates OR "premature infant" OR "low birth-weight infant") AND (massage OR "massage therapy" OR "oil massage") AND (weight OR "weight gain" OR "growth quality" OR growth OR "motor function" OR "neonatal development" OR "growth and development")) | **132** |

Tabla 2 online. Resultados de la intervención

| **Autor** | **Medidas Pretest** | **Medidas Postest** | **Seguimiento** | **Resultados (peso y desarrollo motor)** |
| --- | --- | --- | --- | --- |
| Mathai et al.18 | **Peso (g)**:  GE= 1598g  GC= 1588g  **Desarrollo motor:**  GE= 3.18 (0.47)  GC= 3.17 (0.46) | **Peso ganado por día (g)**: GE= 4.24g o 21.92% mayor que en el GC **Motor (7 a 10 día)**: GE= 3.48 (0.77)  GC= 3.52 (0.28) | **Motor**  **(40a42**  **semanas):**  GE= 4.94 (0.78) GC= 4.57 (0.60) | **Peso:** se obtuvieron ganancias de peso significativas en el GE frente al GC: mayor de 4,24g/día.  Relación positiva entre la duración de la intervención y el peso ganado, pero sin significancia estadística.  **Parámetros neuroconductuales**: el GE mostro mejores resultados en orientación, rango del estado, regulación del estado y estabilidad automática (de manera significativa). |
| Arora et al.19 | **Peso(g):** GE1=1229.7 GE2=1223.4 GC=1260.0 **Desarrollo motor:** GE1= 4.1 GE2= 4.0 GC= 3.9 | **Peso a 28 día**s: GE1=1626.6 GE2=1513.4 GC=1545.0 **Desarrollo motor a los 10 días**:  GE1= 4.7  GE2= 4.8  GC= 4.7 |  | **Peso:** fue mayor en el grupo con aceite (GE1) pero no significativo. Pero excluyendo a los 3 niños con una interrupción de más de 20% en el masaje (que no ganaron o perdieron peso) se observó una mejoría significativa.  **Parámetros neuroconductuales:** NBAS no significativo al inicio como a los 10 días. |
| Lee et al.22 | **Peso (g)**: GE= 1586.20 GC= 1499.20 **Desarrollo motor (%)**: GE(1erdía)= 34.61% GE(10 día)= 36.31% | **Peso(10d)** : GE= 1829.20 GC= 1732.30 **Desarrollo motor :** GE(1erdía)= 42.88% GE(10 día)= 56.53% |  | **Peso**: Efecto significativo a nivel del peso ganado por día, pero sino no hubo diferencia en el peso ganado entre los dos grupos. Los 2 grupos han ganado peso después de los 10 días.  **Actividad motora**: Hubo efectos significativos en la actividad motora entre GE y GC después del masaje. |

**Tabla 2 online.** GE: grupo experimental, GC: grupo control, g: gramos, NBAS: neonatal behavioral assessment scale (test de Brazelton), PDI: psychomotor development index, MDI: Normal Mental Development Index; TIMP: prueba de rendimiento motor infantil, G(O+O): estimulación oral, G(T/K+T/K): estimulación del cuerpo entero, G(O+T/K): estimulación oral y táctil

Continuación Tabla 2 online. Resultados de la intervención

| **Autor** | **Medidas Pretest** | **Medidas Postest** | **Seguimiento** | **Resultados (peso y desarrollo motor)** |
| --- | --- | --- | --- | --- |
| Field et al.21 | **Peso ganado (g)**:  GE1= 22.2g  GE2= 28.8g **Movimiento (%):**  GE1= 6.9%  GE2= 9.9% | **Peso ganado durante(g)**:  GE1= 27.8g GE2= 27.4g **Movimiento durante (%):** GE1=6.1% GE2= 18.0% |  | **Peso:** En el grupo de masaje con presión moderada (GE1), se puede ver un aumento de peso comparando con el grupo de masaje con presión leve (GE2). (Estadísticamente significativo).  **Actividad motora**: menos movimiento en el GE1 que en el GE2 por el hecho de ser menos estresado y más relajado. |
| Vaivre-Douret et al.16 | **Peso nacimiento**: GE1= 1820g GE2= 1933g GE3= 1980g GC= 1545g **Desarrollo motor** : No hay medidas pre-test | **Peso:** GE1= ganaron 301g (+54% comparando con GC) GE2= +216g (+13%) GE3= +230g (+20%)  GC= +192g  **Desarrollo motor:**  GE1/GC= 0.003  GE2/GC= 1.119  GE3/GC= 0.053  (GE2+GE1+GE3)/GC= 0.004 |  | **Peso:** en los grupos de "SMT Touch" fue 30% más alto que en el GC, pero no es significativo. El peso ganado de manera significativa más alto que en GC fue con ISIO4 (GE1).  **Neuropsicomotor:** Todos los grupos mostraron un progreso, pero el GE1 tuvo un resultado significativo más alto que en GC o P (GE3). Mayor efecto del masaje con ISIO. Óculomotor, orientación, sensorimotor mayor en los grupos con masaje y aun mejor con ISIO. |
| Procianoy et al.20 | **Peso al nacer(g)**:  GE= 1192 ± 189  GC= 1151 ± 198 | **Peso al alta(g):**  GE= 1973 ± 150  GC= 2028 ± 247 | **2 anos de edad corregida:** **Peso(g):**  GE= 11,403±1558 GC= 10,891±932 **PDI**:  GE= 86.2 ± 2.1 GC= 84.2 ± 6.28 | **Peso:** Ninguna diferencia significativa a nivel del peso al alta o a los 2 anos.  **Desarrollo motor**: PDI mas alto pero no significativamente. MDI fue significativamente más alto en el GE que en el GC. |

**Tabla 2 online.** GE: grupo experimental, GC: grupo control, g: gramos, NBAS: neonatal behavioral assessment scale (test de Brazelton), PDI: psychomotor development index, MDI: Normal Mental Development Index; TIMP: prueba de rendimiento motor infantil, G(O+O): estimulación oral, G(T/K+T/K): estimulación del cuerpo entero, G(O+T/K): estimulación oral y táctil

Continuación Tabla 2 online. Resultados de la intervención

| **Autor** | **Medidas Pretest** | **Medidas Postest** | **Seguimiento** | **Resultados (peso y desarrollo motor)** |
| --- | --- | --- | --- | --- |
| Ho et al.5 | Prematuros con resultados iniciales bajos en el TIMP  (<35)  **Peso**(g):  GE= 1542.5 +- 319.4 GC= 1436.0 +- 268.8 **TIMP**:  GE=25.3 +- 5.7 GC=28.6 +- 6.6 | Prematuros con resultados iniciales bajos en el TIMP (<35) **Peso ganado(g)**:  GE=1097.0 +- 323.1  GC=868.0 +- 232.4 Diferencia=229.0  **TIMP ganado:**  GE=34.3 +- 5.5  GC=27.2 +- 5.2 Diferencia=7.1 |  | **Peso:** No diferencias significativas al estudiar el grupo entero.  **Rendimiento motor:** No diferencias significativas al estudiar el grupo entero. Pero en subgrupo, los prematuros con una pobre puntuación TIMP, después de recibir el masaje presentaron una puntación TIMP más elevada significativamente. |
| Fucile et al.6 | **Peso(g)**:  GE1=1,676.3 ± 281.0 GE2=1,673.4 ± 236.2  GE3=1,615.8 ± 287.1  GC=1,709.5 ± 236.9    **Desarrollo motor:**  No hay | **Peso ganado durante**: GE1=17.4 ± 6.1  GE2=17.6 ± 3.8 GE3=15.7 ± 4.6  GC=12.6 ± 5.9 **Peso ganado después**: GE1=16.1 ± 6.9  GE2=15.1 ± 7.4 GE3=13.1 ± 7.3  GC=14.3 ± 5.4 **Resultados TIMP**:GE1=34.6 ± 4.5  GE2=6.7 ± 4.0 GE3=36.9 ± 4.7  GC=30.2 ± 8.2 |  | **Peso**: El peso ganado fue mayor durante la intervención sensorimotor. Mayor ganancia de peso (de manera significativa) en los grupos GE1 y GE2 que en el GC.  **Rendimiento motor**: Resultado significativamente más alto de TIMP en GE2 o GE3 que en GC. Menos proporciones de niños con conductas motoras atípicas en GE2 y GE3 que GC (significativo). No diferencia a nivel de conductas motoras entre GC y GE1. |

**Tabla 2 online.** GE: grupo experimental, GC: grupo control, g: gramos, NBAS: neonatal behavioral assessment scale (test de Brazelton), PDI: psychomotor development index, MDI: Normal Mental Development Index; TIMP: prueba de rendimiento motor infantil, G(O+O): estimulación oral, G(T/K+T/K): estimulación del cuerpo entero, G(O+T/K): estimulación oral y táctil

Continuación Tabla 2 online. Resultados de la intervención

| **Autor** | **Medidas Pretest** | **Medidas Postest** | **Seguimiento** | **Resultados (peso y desarrollo motor)** |
| --- | --- | --- | --- | --- |
| Ferreira et al.7 | **Peso(g):**  GE= 1910.31 (±300.86) GC= 1872.81 (±407.85)  **Desarrollo motor**:  No hay | **Peso ganado**: GE= 6.08 (±13.33) GC= 4.53 (±26.66) **Desarrollo motor**: Hipotonía:  GE= 14.25 (30.96) GC= 54.17 (42.94) Tono equilibrado: GE= 74.5 (31.51) GC= 26.19 (39.32) Postura extendida: GE= 17.75 (20.23) GC= 46.58 (40.46) Postura flexora: GE= 18 (27.74) GC= 11.76 (28.46) Ambos posturas: GE= 64.25 (30.06) GC= 41.67 (37.36) Movimientos coordinados: GE= 4.76 (3.94) GC= 1.12 (1.86) Movimientos descoordinados: GE= 2.64 (2.75) GC= 4.36 (4.51) |  | **Peso**: los datos no fueron estadísticamente significativos, pero se puede observar una tendencia a la ganancia de peso del GE al compararlo con el GC.  **Desarrollo motor**: el GE pasa más tiempo en ambas posturas con un tono más equilibrado que en el GC. Para el GC, la postura principal fue con extensión e hipotonía. El GE actúa con más movimientos coordinados y tiene más movimientos de mano a boca y de soportes. El GE tiene también un tono equilibrado en los 3 intervalos (divididos por edades). Y en el GC, se observa una mayor hipotonía en los intervalos I y II. (En el GE, han pasado más tiempo en ambas posturas en el intervalo I y en flexión en el intervalo II). (significativo) |
| Abdallah et al.17 | **Peso al nacer (g)**:  GE= 1747 ± 389 GC= 1684 ± 446. **Peso durante la estancia en la NICU (g)**:  GE= 1842.84 ± 174.34 GC= 1772.14 ± 143.65 | **Peso al alta (g)**:  GE= 1950.21 ± 180.85  GC= 1903.81 ± 212.37 **Desarrollo motor (12 meses de edad corregida):**  GE= 99.26 ± 13.11  GC= 95.38 ± 14.26 |  | **Peso:** los resultados no han variado entre los 2 grupos.  **Desarrollo motor**: los resultados no han variado entre los 2 grupos.  **Resultados cognitivos:** A los 12 meses, los resultados han sido mayores en el GE (significativo). |

**Tabla 2 online.** GE: grupo experimental, GC: grupo control, g: gramos, NBAS: neonatal behavioral assessment scale (test de Brazelton), PDI: psychomotor development index, MDI: Normal Mental Development Index; TIMP: prueba de rendimiento motor infantil, G(O+O): estimulación oral, G(T/K+T/K): estimulación del cuerpo entero, G(O+T/K): estimulación oral y táctil
